# Supplementary material for: Learning From Success, Not Catastrophe: Using Counterfactual Analysis to Highlight Successful Disaster Risk Reduction Interventions
Source: Frontiers journal article supplement (doi:10.3389/feart.2022.847196), 2022-05-05
Supplement: Data_Sheet_1.pdf [file Data_Sheet_1.pdf]

## Supplementary Material

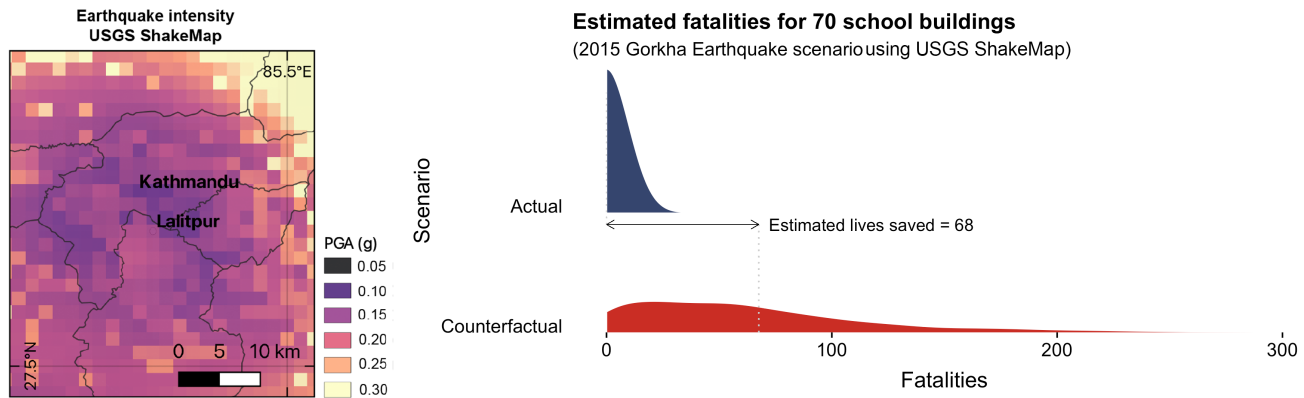

**Figure S1.** A re-analysis of the case study described in Section 5.1 is performed using the peak ground acceleration map for the 2015  $M_w$  7.8 Gorkha earthquake obtained from USGS ShakeMap (2015) (shown on the left). Using this hazard model, our analysis show an estimated of 68 lives saved in the 70 retrofitted schools.

## REFERENCES

USGS ShakeMap (2015). PGA Map for the M 7.8 - 67 km NNE of Bharatpur, Nepal earthquake event. *USGS ShakeMap Earthquake Hazards Program* Accessed 12 01 2021. <https://earthquake.usgs.gov/earthquakes/eventpage/us20002926/shakemap/pga>
